# Supplementary material
Source: PubMed Central journal article supplement (PMC8825458)
Supplement: kiab363_supplementary_data.pdf [file kiab363_supplementary_data.pdf]

## SUPPLEMENTAL FIGURES

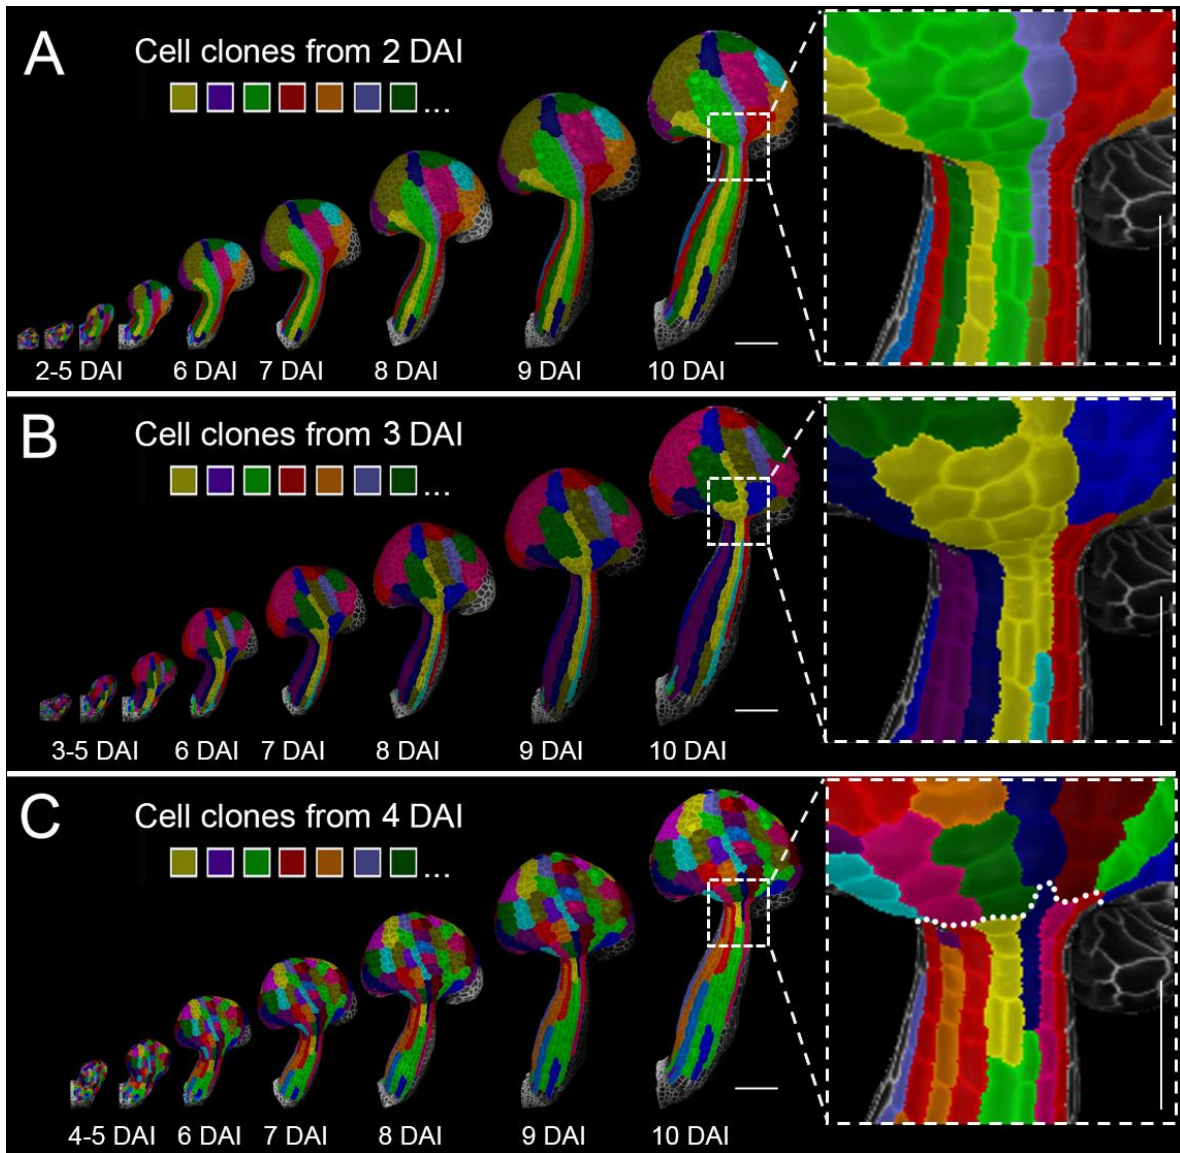

**Supplemental Figure S1.** The specification of anther and filament occurs 4 days after stamen primordia initiation. A-C, Cell lineage tracing analysis in the early stamen. Colors indicate clones developing from single cells at two (A), three (B) and four (C) DAI displayed on the digitally extracted stamen surface. Dotted line indicates a clear separation of the sectors located in the anther and filament originating from individual cells at 4 DAI. DAI indicates days after primordium initiation. Scale bars, 100  $\mu\text{m}$  (50  $\mu\text{m}$  in insets).

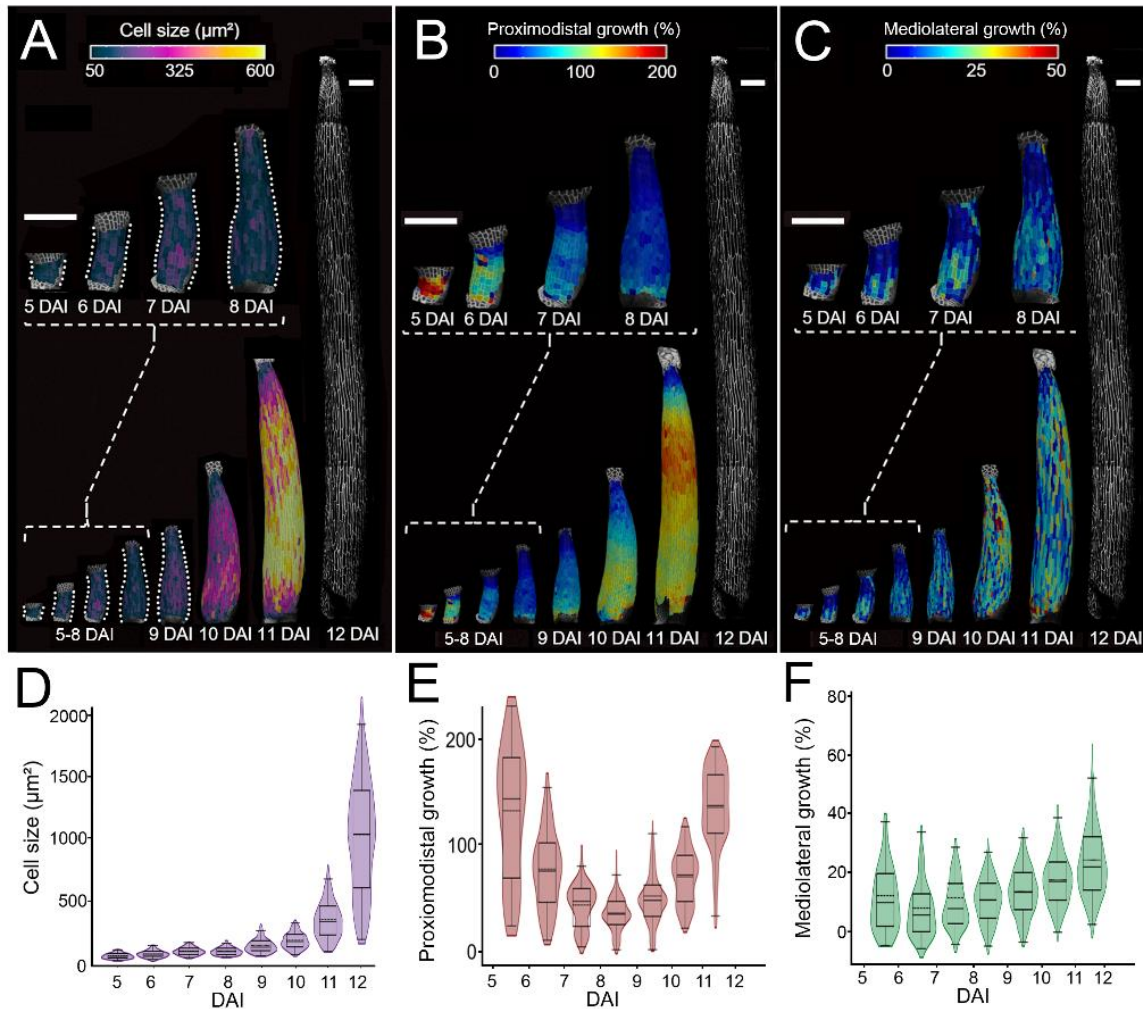

**Supplemental Figure S2.** Increase in cell size along the proximodistal axis underlies late filament elongation. A-C, Heat-maps of cell size (A), and area extension along the proximodistal (B) and mediolateral (C) axis. Heat-maps generated between consecutive time points are displayed on the first time point. White signal in (A-C) at 12 DAI indicates cell outlines. D-F, Quantification of cell size (D), and area extension along the proximodistal (E) and mediolateral (F) axis. Violin plots contain 95% and boxplots 90% of the values, respectively. The boxes indicate the range between the first and the third quartile and the whiskers include 90% of the values. Lines represent median and dashed lines represent the mean (9 independent time-lapse series;  $n > 127$  cells). DAI indicates days after primordium initiation. Scale bars, 100  $\mu\text{m}$ .
